# Supplementary material
Source: MDPI journal article supplement (https://www.mdpi.com/search?q=materials-12-00167)
Supplement: s001 [file materials-12-00167-s001.pdf]

# The Effect of the Isomeric Chlorine Substitutions on the Honeycomb-Patterned Films of Poly(x-chlorostyrene)s/Polystyrene Blends and Copolymers via Static Breath Figure technique

Leire Ruiz-Rubio <sup>1,2,\*</sup>, Leyre Pérez-Álvarez <sup>1,2</sup>, Jula Sanchez-Bodón <sup>1</sup>, Valeria Arrighi <sup>3</sup> and José Luis Vilas-Vilela <sup>1,2</sup>

- <sup>1</sup> Grupo de Química Macromolecular (LABQUIMAC) Dpto. Química-Física, Facultad de Ciencia y Tecnología, Universidad del País Vasco (UPV/EHU), 48940 Leioa, Bizkaia, Spain; leyre.perez@ehu.eus (L.P.-Á.); jsanchez903@ikasle.ehu.eus (J.S.-B.); joseluis.vilas@ehu.eus (J.L.V.-V.)
- <sup>2</sup> BCMaterials, Basque Center for Materials, Applications and Nanostructures, UPV/EHU Science Park, 48940 Leioa, Spain
- <sup>3</sup> Chemical Sciences, School of Engineering & Physical Sciences, Heriot-Watt University, Edinburgh EH14 4AS, UK; V.Arrighi@hw.ac.uk
- \* Correspondence: leire.ruiz@ehu.eus; Tel.: +34-946017972

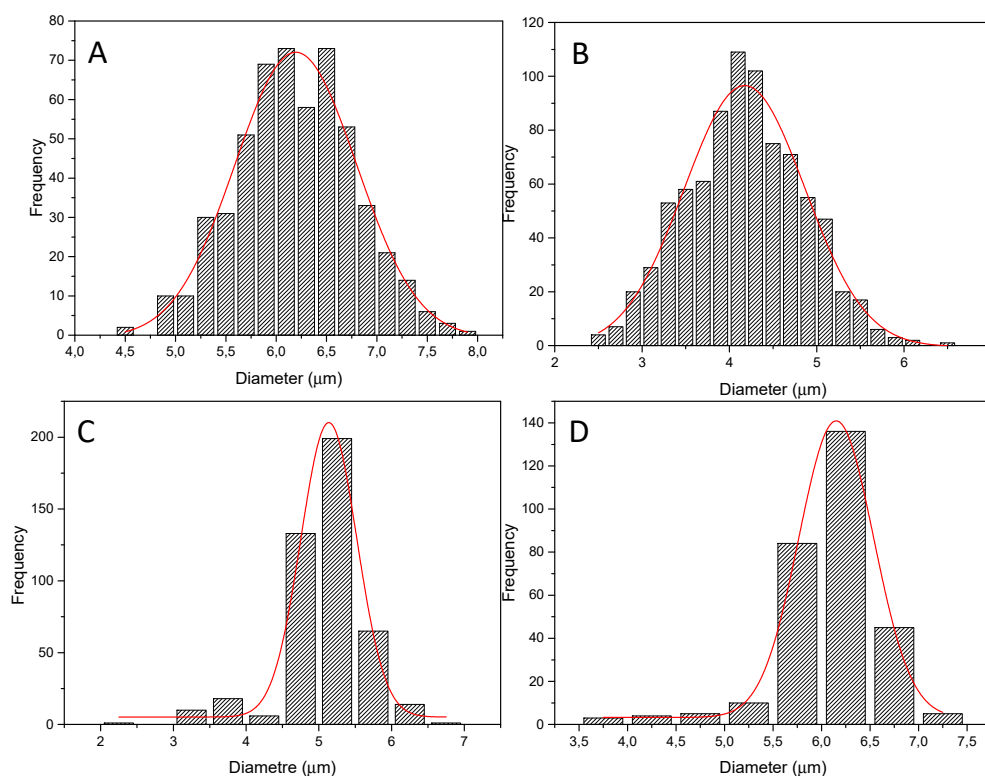

Figure S1. Pore size distribution in THF at 90%RH for: A) polystyrene, B) poly(2-chlorostyrene), C) poly(3-chlorostyrene) and D) poly(4-chlorostyrene).

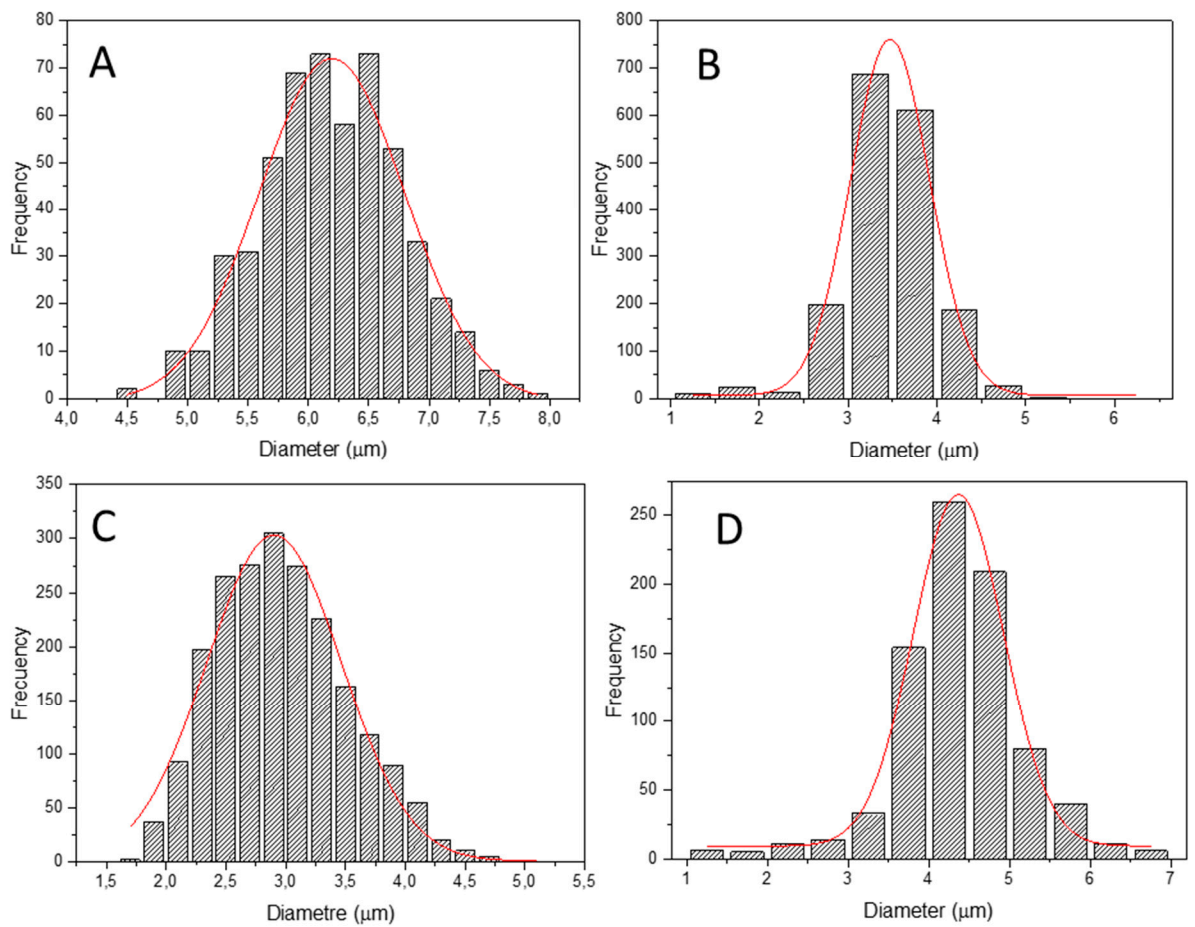

Figure S2. Pore size distribution in THF at 90%RH for: A) polystyrene, B) poly(2-chlorostyrene-co-styrene), C) poly(3-chlorostyrene-co-styrene) and D) poly(4-chlorostyrene-co-styrene).

Table S1. Glass transition temperatures of PS and P(xClS)s

| Sample                | Glass transition temperature (°C) |
|-----------------------|-----------------------------------|
| Polystyrene           | 105                               |
| Poly(2-chlorostyrene) | 109                               |
| Poly(3-chlorostyrene) | 84                                |
| Poly(4-chlorostyrene) | 126                               |

Table S2. Glass transition temperatures of P(S-co-xClS)s

| Sample                           | Glass transition temperature (°C) |
|----------------------------------|-----------------------------------|
| Polystyrene                      | 105                               |
| Poly(2-chlorostyrene-co-styrene) | 110                               |
| Poly(3-chlorostyrene-co-styrene) | 99                                |
| Poly(4-chlorostyrene-co-styrene) | 110                               |

Table S3. Glass transition temperatures of PS/P(xCIS) blends 90/10.

| Sample      | Glass transition temperature (°C) |
|-------------|-----------------------------------|
| Polystyrene | 105                               |
| PS/P2CIS    | 89                                |
| PS/P3CIS    | 101                               |
| PS/P4CIS    | 90                                |

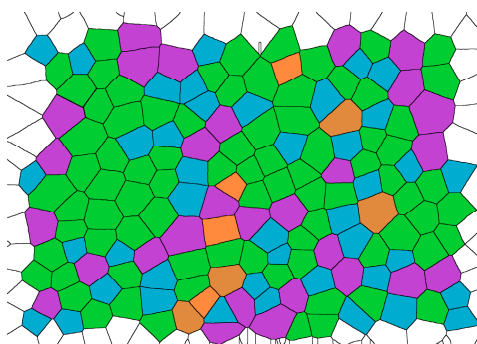

Figure S3. Voronoi tessellation for polystyrene/poly(3-chlorostyrene blend. (Orange=P<sub>4</sub>, Blue=P<sub>5</sub>, Green=P<sub>6</sub>, Purple=P<sub>7</sub>, Brown=P<sub>8</sub>)
